# Supplementary material for: Pan-cancer analysis reveals the prognostic and immunotherapeutic value of cytoskeleton-associated protein 2-like
Source: Springer Nature journal article supplement (doi:10.1038/s41598-023-35633-3), 2023-05-24
Supplement: MOESM1 [file 41598_2023_35633_MOESM1_ESM.pdf]

# Pan-cancer Analysis Reveals the Prognostic and Immunotherapeutic Value of Cytoskeleton-associated Protein 2-Like

Bocun Yi<sup>1†</sup>, Qingfeng Fu<sup>1†</sup>, Zhiwen Zheng<sup>1†</sup>, Man Zhang<sup>2</sup>, Dongze Liu<sup>1</sup>, Zhengxin Liang<sup>1</sup>, Shengxian XU<sup>1</sup>, Zhihong Zhang<sup>1\*</sup>

<sup>1</sup>Department of Urology, Tianjin Institute of Urology, The Second Hospital of Tianjin Medical University, Tianjin, China.

<sup>2</sup>Tianjin Key Laboratory of Metabolic Diseases, Tianjin Institute of Endocrinology, Chu Hsien-I Memorial Hospital of Tianjin Medical University, Tianjin, China.

**\*Correspondence:**

Zhihong Zhang

drzhihong@126.com

† These authors contributed equally to this work and share first authorship.

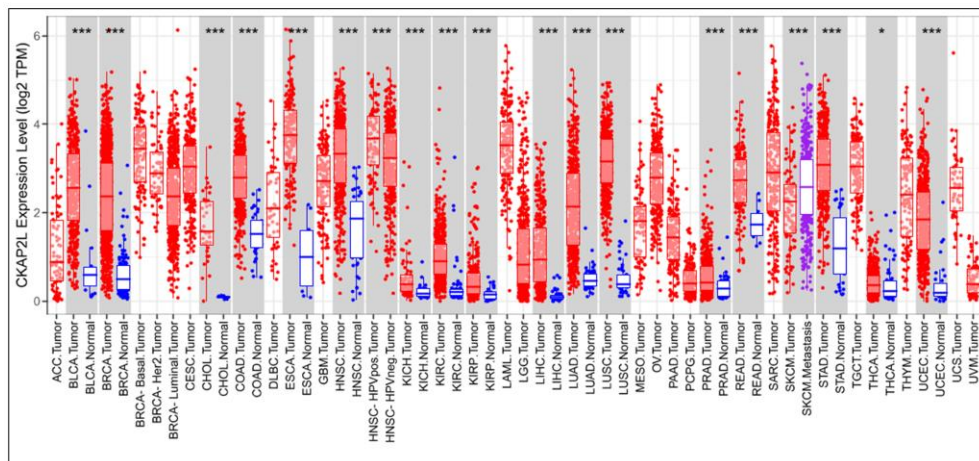

**Supplementary figure S1.** Expression of CKAP2L in various cancer types according to TIMER2.0. (\* $p < 0.05$ ; \*\* $p < 0.01$ ; and \*\*\* $p < 0.001$ ; \*\*\*\* $p < 0.0001$ .)

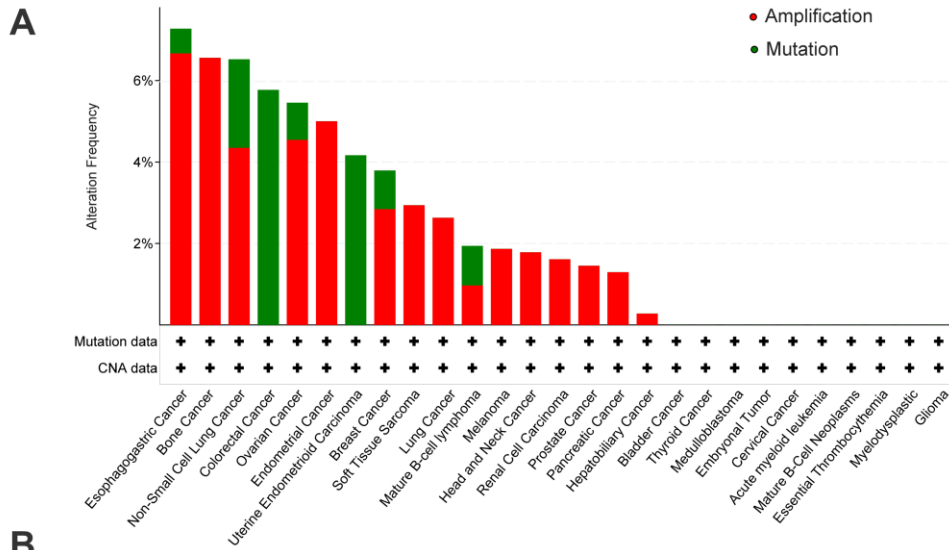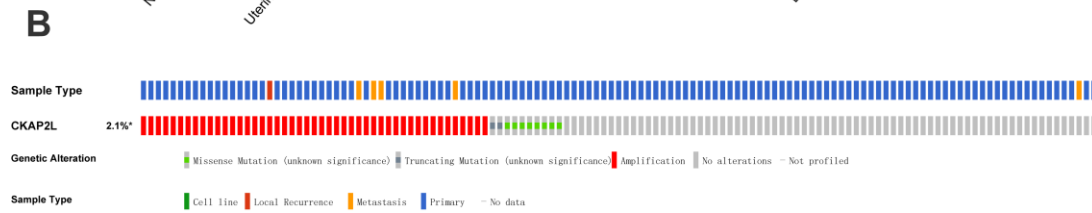

**Supplementary figure S2.** (A) Genomic alteration analysis of CKAP2L across cancer types. (B) General profile of genetic alterations in CKAP2L.

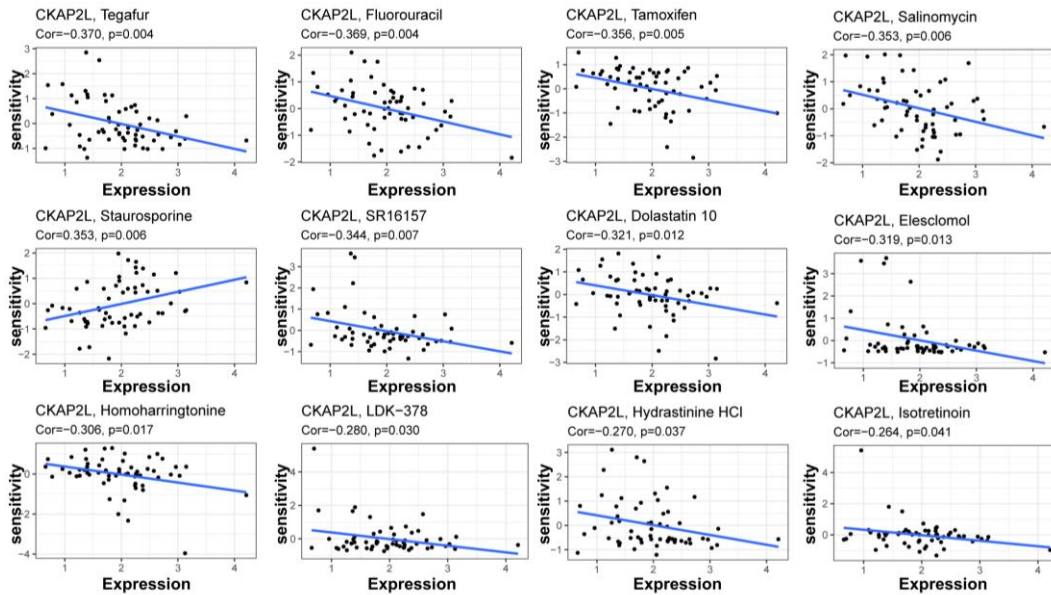

**Supplementary figure S3.** Relationship between CKAP2L expression and chemotherapy drug response.

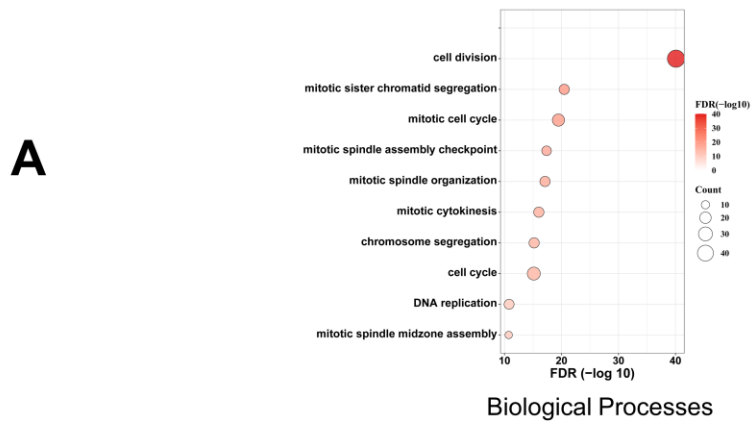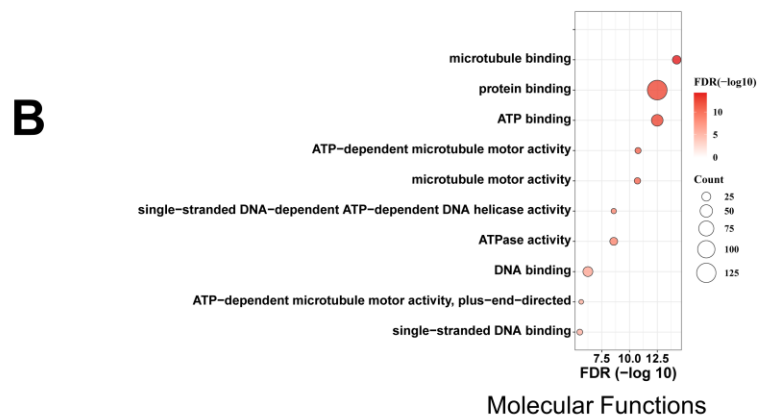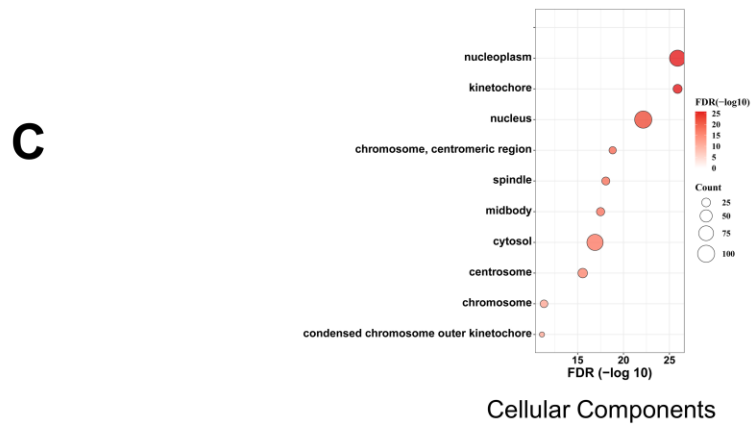

**Supplementary figure S4. GO enrichment analysis of CKAP2L. (A) Biological processes. (B) Molecular Function. (C) Cellular Components.**

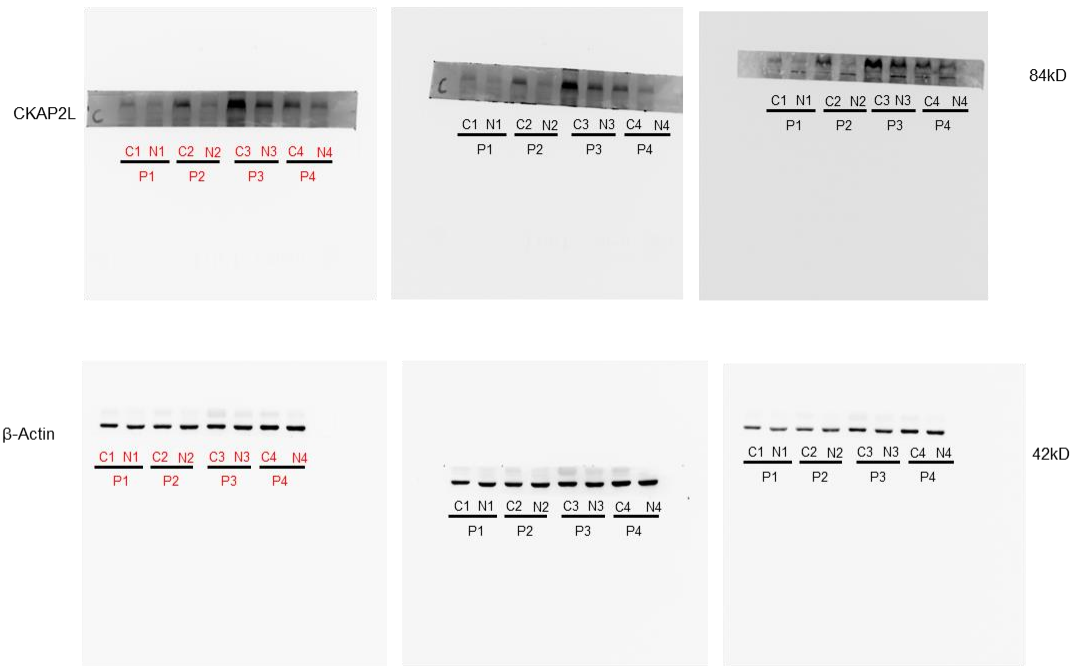

**Supplementary figure S5.** Original data of Figure 1G: CKAP2L expression levels in tumor tissues and adjacent tissues of four KIRC patients were measured using western-blot assays. Regarding the TMN staging of the four patients, P1 was stage T1, P2, P3 and P4 were stage T3. The red font marks the source of the cropped images in the manuscript. (In the course of the experiment, we cut the membranes according to the molecular weight of the protein before hybridization with the antibody)

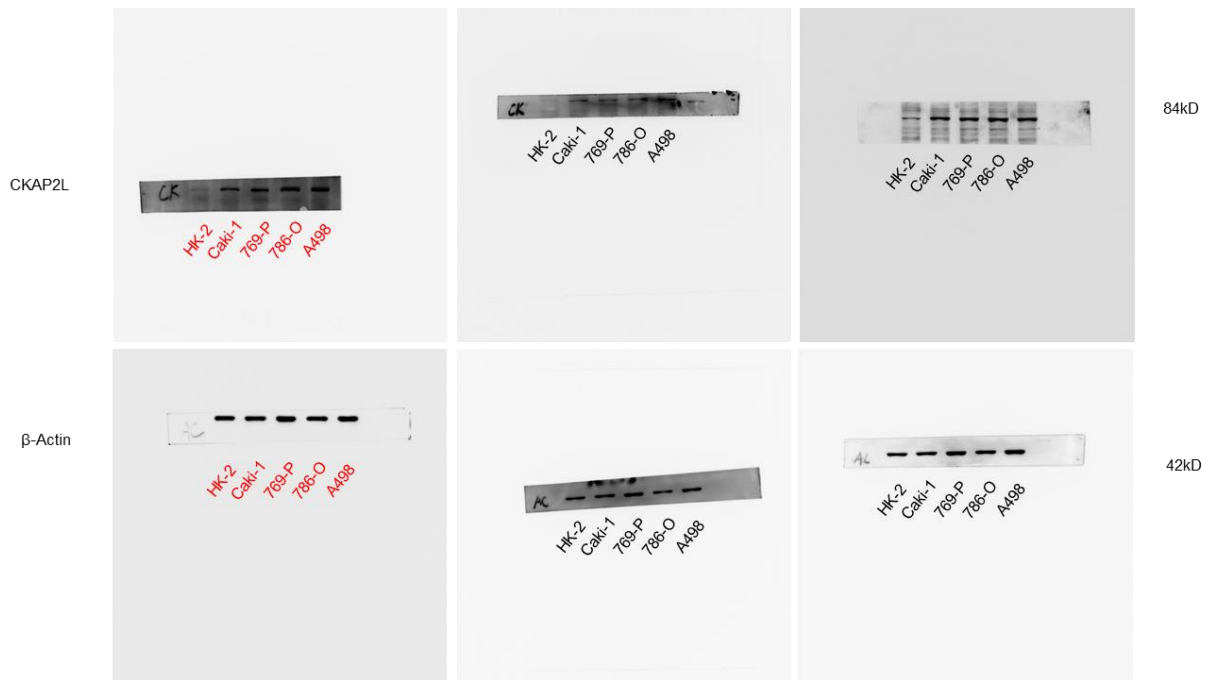

**Supplementary figure S6.** Original data of Figure 1H: Expression of CKAP2L in HK-2, Caki-1, 769-P, 786-O and A498 cells. The red font marks the source of the cropped images in the manuscript. (In the course of the experiment, we cut the membranes according to the molecular weight of the protein before hybridization with the antibody)

CKAP2L

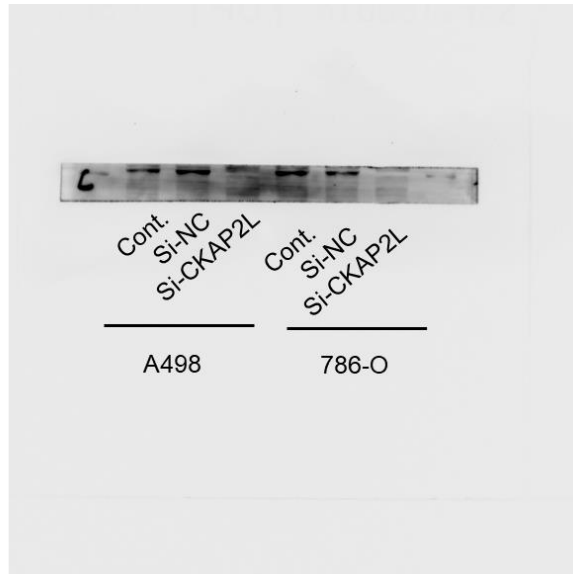

84kD

$\beta$ -Actin

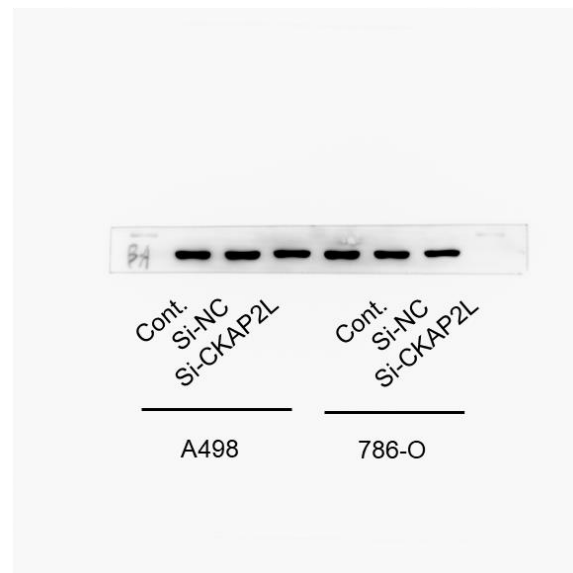

42kD

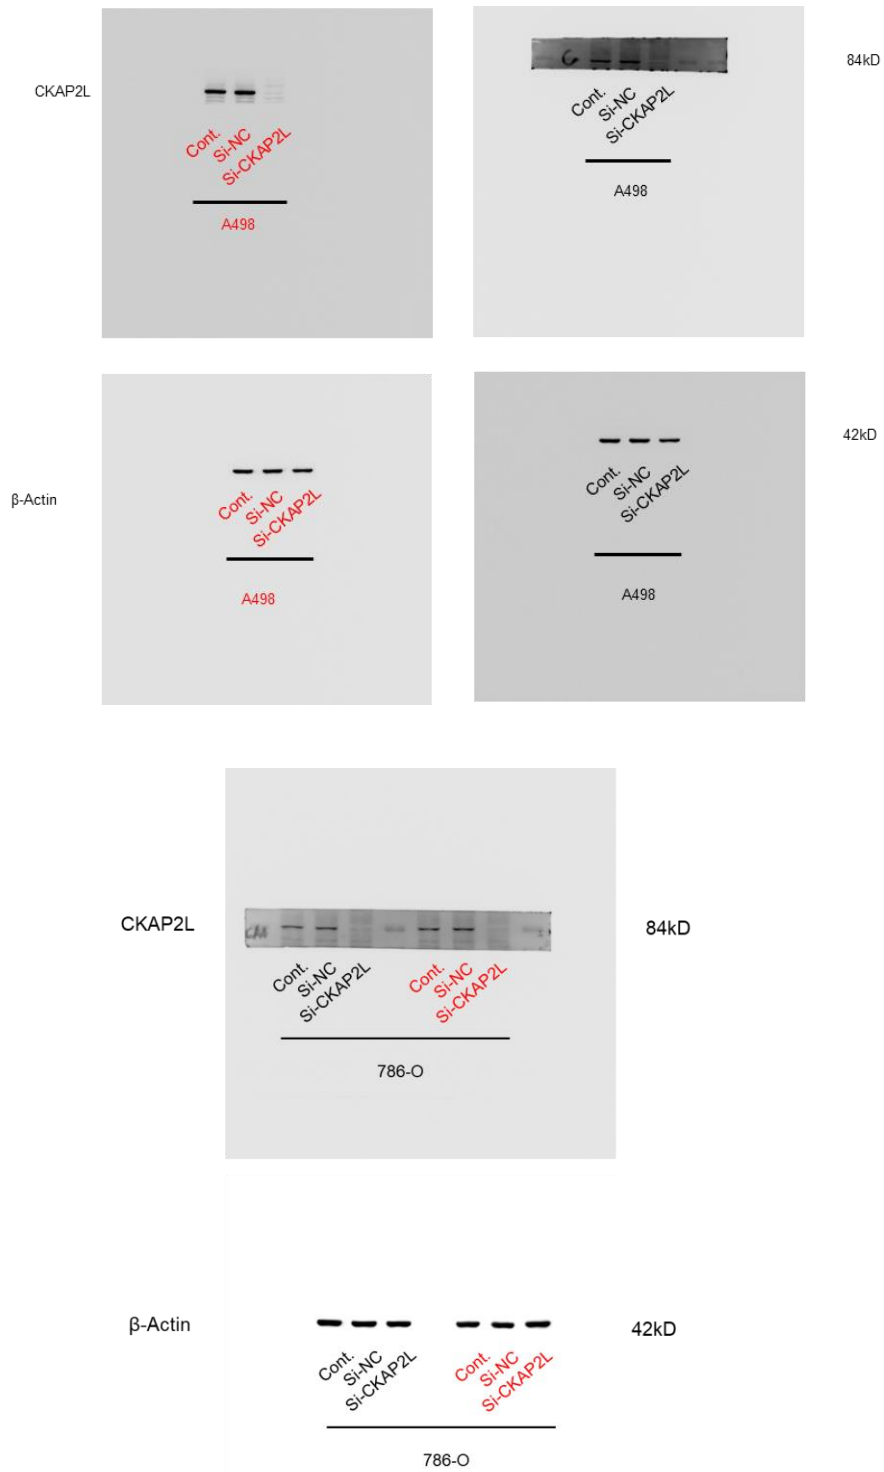

**Supplementary figure S7.** Original data of Figure 4A: Knockdown efficiency of CKAP2L after siRNA transfection of A498 and 786-O cells. The red font marks the source of the cropped images in the manuscript. (In the course of the experiment, we cut the membranes according to the molecular weight of the protein before hybridization with the antibody)

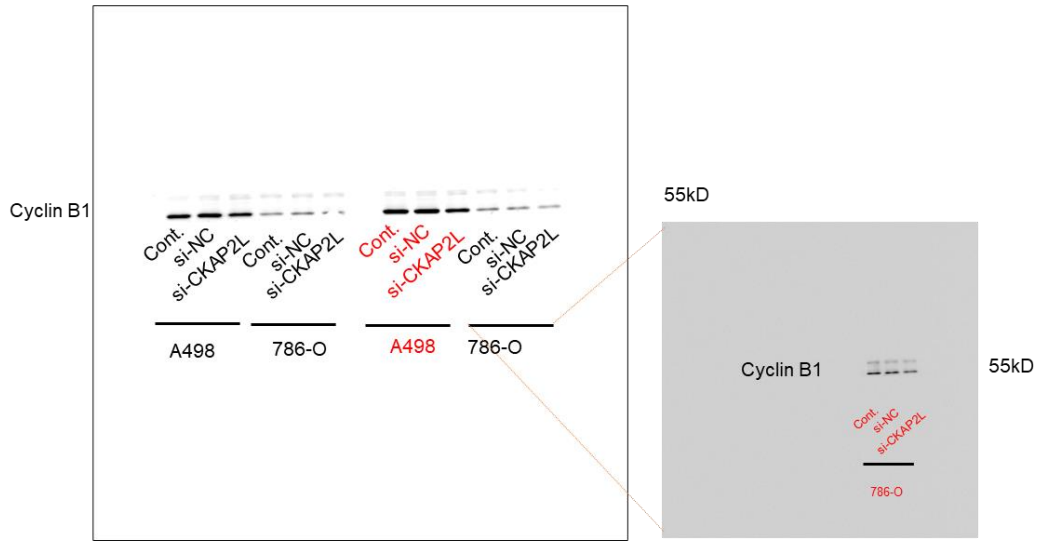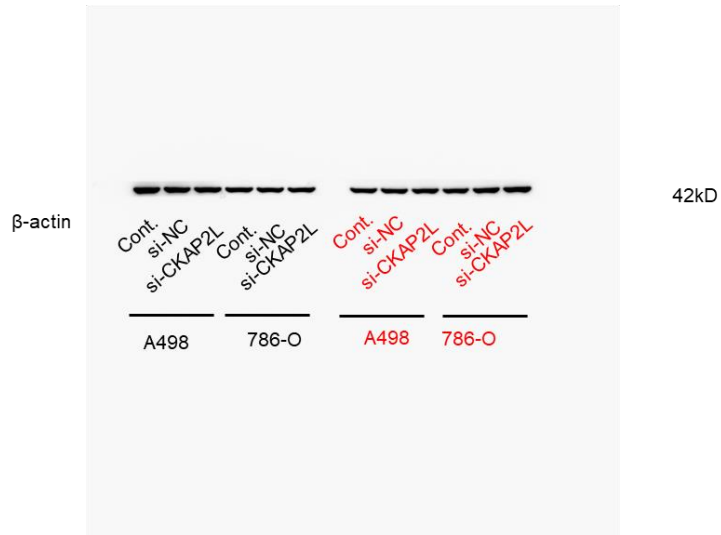

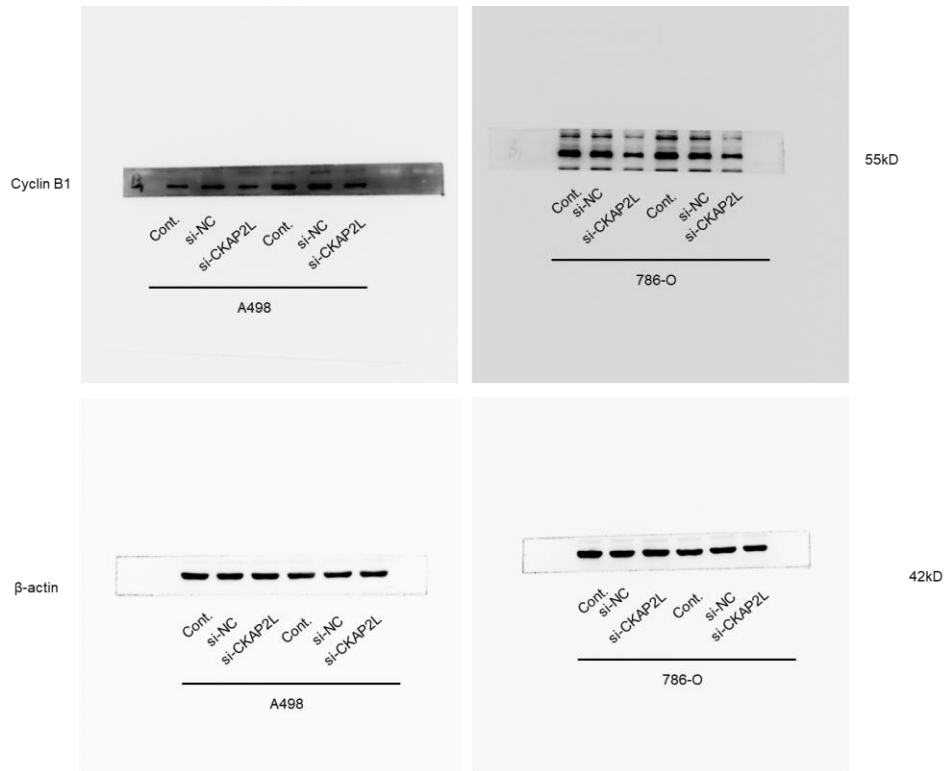

**Supplementary figure S8.** Original data of Figure 6D, the images in the red boxes are cropped and used in the manuscript.: Protein blotting demonstrated that the knockdown of CKAP2L resulted in decreased expression of cyclin B1 protein in A498 and 786-O cells. The red font marks the source of the cropped images in the manuscript. (In the course of the experiment, we cut the membranes according to the molecular weight of the protein before hybridization with the antibody)

| Supplementary Table 1 |                                                                                                                                                                                                                                                                                                                                                                                                                                                                                                                                                                                                                        |
|-----------------------|------------------------------------------------------------------------------------------------------------------------------------------------------------------------------------------------------------------------------------------------------------------------------------------------------------------------------------------------------------------------------------------------------------------------------------------------------------------------------------------------------------------------------------------------------------------------------------------------------------------------|
| Name                  | domain_summary                                                                                                                                                                                                                                                                                                                                                                                                                                                                                                                                                                                                         |
| ASPM                  | Abnormal spindle-like microcephaly-associated protein: Involved in mitotic spindle regulation and coordination of mitotic processes. The function in regulating microtubule dynamics at spindle poles including spindle orientation, astral microtubule density and poleward microtubule flux seems to depend on the association with the katanin complex formed by KATNA1 and KATNB1. Enhances the microtubule lattice severing activity of KATNA1 by recruiting the katanin complex to microtubules. Can block microtubule minus-end growth and reversely this function can be enhanced by the katanin complex [...] |
| BUB1                  | Mitotic checkpoint serine/threonine-protein kinase BUB1: Serine/threonine-protein kinase that performs 2 crucial functions during mitosis: it is essential for spindle-assembly checkpoint signaling and for correct chromosome alignment. Has a key role in the assembly of checkpoint proteins at the kinetochore, being required for the subsequent localization of CENPF, BUB1B, CENPE and MAD2L1. Required for the kinetochore localization of PLK1. Required for centromeric enrichment of AUKRB in prometaphase. Plays an important role in defining SGO1 localization and thereby affects sister chromat [...] |
| CDCA8                 | Cell division cycle associated 8; Borealin: Component of the chromosomal passenger complex (CPC), a complex that acts as a key regulator of mitosis. The CPC complex has essential functions at the centromere in ensuring correct chromosome alignment and segregation and is required for chromatin-induced microtubule stabilization and spindle assembly. Major effector of the TTK kinase in the control of attachment- error-correction and chromosome alignment                                                                                                                                                 |
| CDK1                  | Cyclin-dependent kinase 1: Plays a key role in the control of the eukaryotic cell cycle by modulating the centrosome cycle as well as mitotic onset; promotes G2-M transition, and regulates G1 progress and G1-S transition via association with multiple interphase cyclins. Required in higher cells for entry into S-phase and mitosis. Phosphorylates PARVA/actopaxin, APC, AMPH, APC, BARD1, Bcl-xL/BCL2L1, BRCA2, CALD1, CASP8, CDC7, CDC20, CDC25A, CDC25C, CC2D1A, CENPA, CSNK2 proteins/CKII, FZR1/CDH1, CDK7, CEBPB, CHAMP1, DMD/dystrophin, EEF1 proteins/EF-1, EZH2, KIF11/EG5, EGFR, FANCG, FOS, [...]   |
| CENPE                 | Centromere-associated protein E: Microtubule plus-end-directed kinetochore motor which plays an important role in chromosome congression, microtubule- kinetochore conjugation and spindle assembly checkpoint activation. Drives chromosome congression (alignment of chromosomes at the spindle equator resulting in the formation of the metaphase plate) by mediating the lateral sliding of polar chromosomes along spindle microtubules towards the spindle equator and by aiding the establishment and maintenance of connections between kinetochores and spindle microtubules. The transport of pole-pr [...] |
| CKAP2L                | Cytoskeleton-associated protein 2-like: Microtubule-associated protein required for mitotic spindle formation and cell-cycle progression in neural progenitor cells                                                                                                                                                                                                                                                                                                                                                                                                                                                    |
| ECT2                  | Protein ECT2: Guanine nucleotide exchange factor (GEF) that catalyzes the exchange of GDP for GTP. Promotes guanine nucleotide exchange on the Rho family members of small GTPases, like RHOA, RHOC, RAC1 and CDC42. Required for signal transduction pathways involved in the regulation of cytokinesis. Component of the centralspindlin complex that serves as a microtubule-dependent and Rho-mediated signaling required for the myosin contractile ring formation during the cell cycle cytokinesis. Regulates the translocation of RHOA from the central spindle to the equatorial region. Plays a role i [...] |
| KIF20A                | Kinesin-like protein KIF20A: Mitotic kinesin required for chromosome passenger complex (CPC)-mediated cytokinesis. Following phosphorylation by PLK1, involved in recruitment of PLK1 to the central spindle. Interacts with guanosine triphosphate (GTP)-bound forms of RAB6A and RAB6B. May act as a motor required for the retrograde RAB6 regulated transport of Golgi membranes and associated vesicles along microtubules. Has a microtubule plus end-directed motility; Kinesins                                                                                                                                |
| NDC80                 | Kinetochore protein NDC80 homolog: Acts as a component of the essential kinetochore- associated NDC80 complex, which is required for chromosome segregation and spindle checkpoint activity. Required for kinetochore integrity and the organization of stable microtubule binding sites in the outer plate of the kinetochore. The NDC80 complex synergistically enhances the affinity of the SKA1 complex for microtubules and may allow the NDC80 complex to track depolymerizing microtubules. Plays a role in chromosome congression and is essential for the end-on attachment of the kinetochores to spin [...] |
| NUSAP1                | Nucleolar and spindle-associated protein 1: Microtubule-associated protein with the capacity to bundle and stabilize microtubules (By similarity). May associate with chromosomes and promote the organization of mitotic spindle microtubules around them; Belongs to the NUSAP family                                                                                                                                                                                                                                                                                                                                |
| SPDL1                 | Spindle apparatus coiled-coil protein 1: Protein Spindly; Required for the localization of dynein and dynactin to the mitotic kintochore. Dynein is believed to control the initial lateral interaction between the kinetochore and spindle microtubules and to facilitate the subsequent formation of end-on kinetochore-microtubule attachments mediated by the NDC80 complex. Also required for correct spindle orientation. Does not appear to be required for the removal of spindle assembly checkpoint (SAC) proteins from the kinetochore upon bipolar spindle attachment. Acts as an adapter protein li [...] |

**Supplementary table 1.** Specific functions of various proteins in PPI analysis.

| <b>Supplementary Table 2</b>                                    |                                                   |
|-----------------------------------------------------------------|---------------------------------------------------|
| Abbreviations and details of the 33 cancer types in this study. |                                                   |
| ACC                                                             | Adrenocortical carcinoma                          |
| BLCA                                                            | Bladder Urothelial Carcinoma                      |
| BRCA                                                            | Breast invasive carcinoma                         |
| CESC                                                            | Cervical squamous cell carcinoma and endocervical |
| CHOL                                                            | Cholangiocarcinoma                                |
| COAD                                                            | Colon adenocarcinoma                              |
| DLBC                                                            | Lymphoid Neoplasm Diffuse Large B-cell Lymphoma   |
| ESCA                                                            | Esophageal carcinoma                              |
| GBM                                                             | Glioblastoma multiforme                           |
| HNSC                                                            | Head and Neck squamous cell carcinoma             |
| KICH                                                            | Kidney Chromophobe                                |
| KIRC                                                            | Kidney renal clear cell carcinoma                 |
| KIRP                                                            | Kidney renal papillary cell carcinoma             |
| LAML                                                            | Acute Myeloid Leukemia                            |
| LGG                                                             | Brain Lower Grade Glioma                          |
| LIHC                                                            | Liver hepatocellular carcinoma                    |
| LUAD                                                            | Lung adenocarcinoma                               |
| LUSC                                                            | Lung squamous cell carcinoma                      |
| MESO                                                            | Mesothelioma                                      |
| OV                                                              | Ovarian serous cystadenocarcinoma                 |
| PAAD                                                            | Pancreatic adenocarcinoma                         |
| PCPG                                                            | Pheochromocytoma and Paraganglioma                |
| PRAD                                                            | Prostate adenocarcinoma                           |
| READ                                                            | Rectum adenocarcinoma                             |
| SARC                                                            | Sarcoma                                           |
| SKCM                                                            | Skin Cutaneous Melanoma                           |
| STAD                                                            | Stomach adenocarcinoma                            |
| TGCT                                                            | Testicular Germ Cell Tumors                       |
| THCA                                                            | Thyroid carcinoma                                 |
| THYM                                                            | Thymoma                                           |
| UCEC                                                            | Uterine Corpus Endometrial Carcinoma              |
| UCS                                                             | Uterine Carcinosarcoma                            |
| UVM                                                             | Uveal Melanoma                                    |

**Supplementary table 2.** The full names and abbreviations of 33 tumors.

| Supplementary Table 3 |                    |  |      |
|-----------------------|--------------------|--|------|
| Gene Symbol           | Gene ID            |  | CC   |
| IBI1                  | ENSG00000169679.14 |  | 0.83 |
| KIF14                 | ENSG00000181931.11 |  | 0.8  |
| RACGAP1               | ENSG00000161800.12 |  | 0.8  |
| KIF11                 | ENSG00000138160.5  |  | 0.79 |
| KIF4A                 | ENSG0000099889.11  |  | 0.79 |
| ARHGAP11A             | ENSG00000198826.10 |  | 0.79 |
| SGOL2                 | ENSG00000163531.17 |  | 0.79 |
| CENPI                 | ENSG00000102384.13 |  | 0.78 |
| KIF23                 | ENSG00000137807.13 |  | 0.78 |
| TPX2                  | ENSG00000088225.15 |  | 0.78 |
| NCAG                  | ENSG00000109829.9  |  | 0.77 |
| NCAPH                 | ENSG00000121452.9  |  | 0.77 |
| DEPDC1                | ENSG0000024526.16  |  | 0.76 |
| CCNA2                 | ENSG00000145389.9  |  | 0.76 |
| MK67                  | ENSG00000148773.12 |  | 0.76 |
| CENPE                 | ENSG00000138778.11 |  | 0.76 |
| KIF18A                | ENSG00000121621.6  |  | 0.75 |
| DLGAP5                | ENSG00000126787.12 |  | 0.75 |
| NUSAP1                | ENSG00000137804.12 |  | 0.75 |
| KIF2C                 | ENSG00000142945.12 |  | 0.74 |
| CEP55                 | ENSG00000138180.15 |  | 0.74 |
| ASPM                  | ENSG00000096279.16 |  | 0.74 |
| RRM2                  | ENSG00000171848.13 |  | 0.74 |
| PLK4                  | ENSG00000142731.10 |  | 0.74 |
| PRC1                  | ENSG00000198901.13 |  | 0.74 |
| CLSPN                 | ENSG00000092853.13 |  | 0.73 |
| FANCI                 | ENSG00000140525.17 |  | 0.73 |
| KIF18B                | ENSG00000186185.13 |  | 0.73 |
| MELK                  | ENSG00000165347.7  |  | 0.73 |
| TKF                   | ENSG00000112742.9  |  | 0.73 |
| KIAA1524              | ENSG00000163507.13 |  | 0.73 |
| NCAPG2                | ENSG00000146918.19 |  | 0.73 |
| SGOL1                 | ENSG00000129810.14 |  | 0.73 |
| GTSE1                 | ENSG00000075218.18 |  | 0.73 |
| PLK1                  | ENSG00000166851.14 |  | 0.72 |
| HMMR                  | ENSG00000172571.19 |  | 0.72 |
| HURP                  | ENSG00000123485.11 |  | 0.72 |
| KIF20A                | ENSG00000112984.11 |  | 0.72 |
| ZWILCH                | ENSG00000174422.11 |  | 0.72 |
| SKA1                  | ENSG00000154839.9  |  | 0.72 |
| CENPL                 | ENSG00000120334.15 |  | 0.72 |
| CKAP2                 | ENSG00000136108.14 |  | 0.72 |
| CCNB2                 | ENSG00000157456.7  |  | 0.72 |
| CDCA5                 | ENSG00000146670.9  |  | 0.71 |
| CENPD                 | ENSG00000138092.10 |  | 0.71 |
| CENPE                 | ENSG00000149503.12 |  | 0.71 |
| KIF20B                | ENSG00000138182.14 |  | 0.71 |
| KIF1C                 | ENSG00000276497.9  |  | 0.7  |
| LAMNB2                | ENSG00000176619.10 |  | 0.7  |
| GS2                   | ENSG00000176025.5  |  | 0.69 |
| CDK1                  | ENSG00000170312.15 |  | 0.69 |
| MCM10                 | ENSG00000085238.16 |  | 0.69 |
| NDC80                 | ENSG00000089866.12 |  | 0.69 |
| DTL                   | ENSG00000143476.17 |  | 0.69 |
| STIL                  | ENSG00000122473.15 |  | 0.69 |
| MADD1L                | ENSG00000164109.13 |  | 0.69 |
| FOXM1                 | ENSG00000111206.12 |  | 0.68 |
| CHEK1                 | ENSG00000149542.12 |  | 0.68 |
| NUP2                  | ENSG00000143228.12 |  | 0.68 |
| SMC2                  | ENSG00000136824.18 |  | 0.68 |
| CENPF                 | ENSG00000117724.12 |  | 0.68 |
| CHCBP1                | ENSG00000171541.8  |  | 0.68 |
| CCNB1                 | ENSG00000134057.14 |  | 0.68 |
| FRX05                 | ENSG00000112029.9  |  | 0.68 |
| GINS1                 | ENSG00000101619.9  |  | 0.68 |
| MCM4                  | ENSG00000104738.16 |  | 0.68 |
| DBF4                  | ENSG00000069637.7  |  | 0.68 |
| DDX45                 | ENSG00000165801.12 |  | 0.67 |
| SPDL1                 | ENSG00000040275.16 |  | 0.67 |
| DIAPH3                | ENSG00000139734.17 |  | 0.67 |
| MCM6                  | ENSG00000076803.4  |  | 0.67 |
| MMS22L                | ENSG00000146263.11 |  | 0.67 |
| CASC5                 | ENSG00000137812.19 |  | 0.67 |
| ESCO2                 | ENSG00000171201.14 |  | 0.67 |
| POLQ                  | ENSG00000051341.13 |  | 0.67 |
| TMPO                  | ENSG00000128002.13 |  | 0.67 |
| SFC5                  | ENSG00000152233.8  |  | 0.67 |
| MCM8                  | ENSG00000125881.13 |  | 0.67 |
| ATAD2                 | ENSG00000156802.12 |  | 0.66 |
| AURKA                 | ENSG00000087586.17 |  | 0.66 |
| SRH1                  | ENSG00000167125.14 |  | 0.66 |
| LAMNB1                | ENSG00000113368.11 |  | 0.66 |
| MASTL                 | ENSG00000120539.14 |  | 0.66 |
| CKXN3                 | ENSG00000105226.19 |  | 0.66 |
| EFZ7                  | ENSG00000165891.15 |  | 0.66 |
| HIRC5                 | ENSG00000089685.14 |  | 0.66 |
| MTBP                  | ENSG00000172167.7  |  | 0.66 |
| EXO1                  | ENSG00000174371.16 |  | 0.66 |
| SASS6                 | ENSG00000158876.9  |  | 0.66 |
| NCAPD2                | ENSG00000103292.12 |  | 0.66 |
| CDC25C                | ENSG00000158402.18 |  | 0.66 |
| CCNF                  | ENSG00000162063.12 |  | 0.65 |
| RUBB1B                | ENSG00000159770.12 |  | 0.65 |
| NKX2                  | ENSG00000117650.12 |  | 0.65 |
| ANLN                  | ENSG0000011426.10  |  | 0.65 |
| RIP1                  | ENSG00000136428.8  |  | 0.65 |
| ESPL1                 | ENSG00000134776.11 |  | 0.65 |
| BRC4                  | ENSG0000012048.19  |  | 0.65 |
| SMC4                  | ENSG00000113810.15 |  | 0.64 |
| MTFR2                 | ENSG00000146410.11 |  | 0.64 |
| POLR2D                | ENSG00000144231.10 |  | 0.64 |
| ZWINT                 | ENSG00000122982.16 |  | 0.64 |
| CENPA                 | ENSG00000115163.14 |  | 0.64 |
| CDC48                 | ENSG00000134690.10 |  | 0.64 |
| PARBPB                | ENSG00000185480.11 |  | 0.64 |
| RPN2                  | ENSG00000182481.8  |  | 0.64 |
| FAM72B                | ENSG00000188610.12 |  | 0.64 |
| FAM72B                | ENSG00000181544.13 |  | 0.64 |
| KIF15                 | ENSG00000163908.16 |  | 0.64 |
| WDR76                 | ENSG00000092470.11 |  | 0.64 |
| CENPK                 | ENSG00000123219.12 |  | 0.64 |
| RBL1                  | ENSG00000080839.11 |  | 0.64 |
| TRFR                  | ENSG00000146534.13 |  | 0.63 |
| NEM1                  | ENSG00000166881.9  |  | 0.63 |
| FAM72D                | ENSG00000215784.5  |  | 0.63 |
| ECT2                  | ENSG00000114346.13 |  | 0.63 |
| HQAP3                 | ENSG00000183856.10 |  | 0.63 |
| RAD51AP1              | ENSG00000111247.14 |  | 0.63 |
| GMS2                  | ENSG00000163655.15 |  | 0.63 |
| GPS                   | ENSG00000104147.8  |  | 0.63 |
| NUP155                | ENSG00000113569.15 |  | 0.63 |
| PICM1                 | ENSG00000132326.11 |  | 0.63 |
| C16orf112             | ENSG0000000460.16  |  | 0.62 |
| FBK                   | ENSG00000168078.9  |  | 0.62 |
| XKPC2                 | ENSG00000196542.2  |  | 0.62 |
| SKA3                  | ENSG00000165480.15 |  | 0.62 |
| LIN9                  | ENSG00000183814.15 |  | 0.62 |
| BOKA                  | ENSG00000136122.15 |  | 0.62 |
| CEP78                 | ENSG00000148019.12 |  | 0.62 |
| TOPBP1                | ENSG00000163781.12 |  | 0.62 |
| CDC44                 | ENSG00000170779.10 |  | 0.62 |
| ACTB3                 | ENSG00000115991.11 |  | 0.62 |
| LRR1                  | ENSG00000165501.16 |  | 0.62 |
| EZH2                  | ENSG00000106462.10 |  | 0.62 |
| MCM2                  | ENSG00000077111.13 |  | 0.62 |
| NDC1                  | ENSG00000058804.11 |  | 0.62 |
| DSC1                  | ENSG00000136982.5  |  | 0.62 |
| C17orf53              | ENSG00000125719.14 |  | 0.61 |
| ORC6                  | ENSG00000091651.8  |  | 0.61 |
| TFP2                  | ENSG00000116830.11 |  | 0.61 |
| FEN1                  | ENSG00000168496.7  |  | 0.61 |
| TIMELESS              | ENSG00000116421.11 |  | 0.61 |
| RAD51                 | ENSG00000051180.16 |  | 0.61 |
| PRPF40A               | ENSG00000196504.15 |  | 0.61 |
| ORC1                  | ENSG00000085401.12 |  | 0.61 |
| FAM72C                | ENSG00000263133.5  |  | 0.61 |
| RFC5                  | ENSG00000111445.13 |  | 0.61 |
| RQCD1                 | ENSG00000144580.13 |  | 0.61 |
| TBC1D31               | ENSG00000156787.16 |  | 0.61 |
| NDE1                  | ENSG00000072864.12 |  | 0.61 |
| DBF4P1                | ENSG00000125489.4  |  | 0.61 |
| DEK                   | ENSG00000124795.14 |  | 0.61 |
| RFW2D3                | ENSG00000168411.13 |  | 0.61 |
| EXCLRE1B              | ENSG00000118654.4  |  | 0.61 |
| SRSF3                 | ENSG00000112081.16 |  | 0.61 |
| AURKB                 | ENSG00000178999.12 |  | 0.61 |

**Supplementary table 3.** The 156 genes were obtained from the GEPIA2 database with a correlation coefficient greater than 0.6 with CKAP2L.
